# Supplementary material for: Micro/nano-net guides M2-pattern macrophage cytoskeleton distribution via Src–ROCK signalling for enhanced angiogenesis
Source: Royal Society of Chemistry journal article supplement (doi:10.1039/d1bm00116g), 2021-01-01
Supplement: d1bm00116g1.pdf [file d1bm00116g1.pdf]

## **Supplementary materials**

### **Micro/Nano-Net Guides M2-Pattern Macrophage Cytoskeleton Distribution via Src-Rock Signalling for Enhanced Angiogenesis**

Yang Yang<sup>1, 2</sup>, Yujing Lin<sup>1, 2</sup>, Zhengchuan Zhang<sup>1, 2</sup>, Ruogu Xu<sup>1, 2</sup>, Xiaoran Yu<sup>1, 2</sup>,  
Feilong Deng<sup>\*,1,2</sup>

<sup>1</sup>Department of Oral Implantology, Guanghua School of Stomatology, Hospital of  
Stomatology, Sun Yat-Sen University, Guangzhou, PR China

<sup>2</sup>Guangdong Provincial Key Laboratory of Stomatology, Guangzhou, PR China

\*Correspondence: Feilong Deng

Department of Oral Implantology, Guanghua School of Stomatology, Hospital of  
Stomatology, Sun Yat-sen University, No.56, Ling Yuan Xi Road, Guangzhou 510055,  
PR China.

Tel +86 20 83862537

Fax +86 20 83822807

Email [dengfl@mail.sysu.edu.cn](mailto:dengfl@mail.sysu.edu.cn)

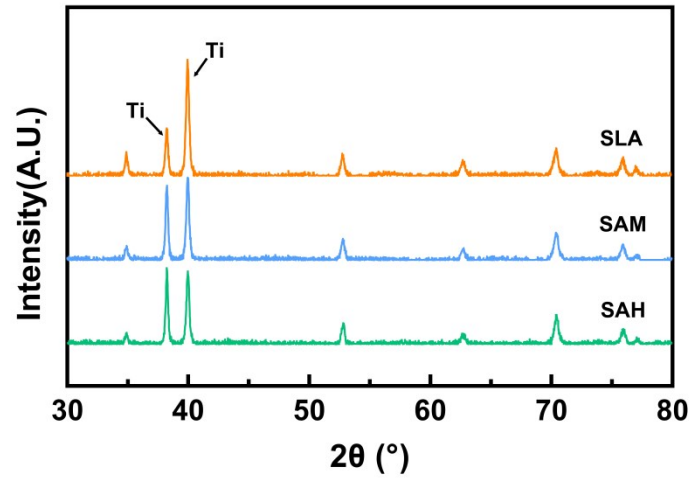

**Figure S1.** Titanium specimen characteristics. XRD spectra showed the crystalline phases of the samples, the diffraction peaks of Titanium were distributed at around 38° and 40°.

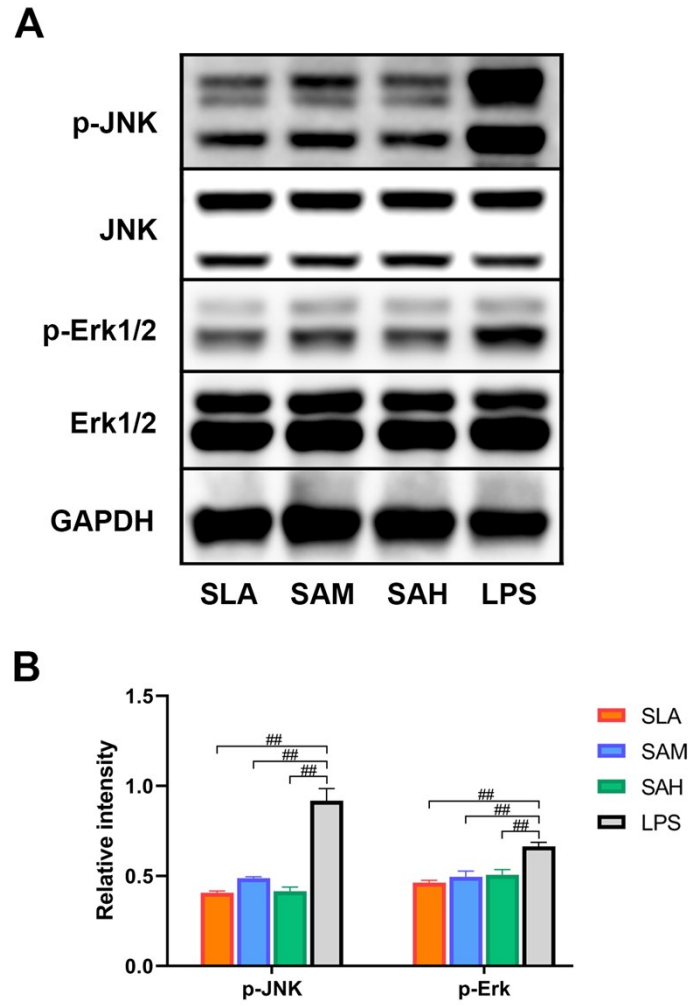

**Figure S2.** (A)Western blotting test of p-JNK/JNK and p-ERK/ERK at 4h. (B)The relative expression of p-ERK to ERK and p-JNK to JNK, respectively, was measured. ##P<0.01 compared with LPS.

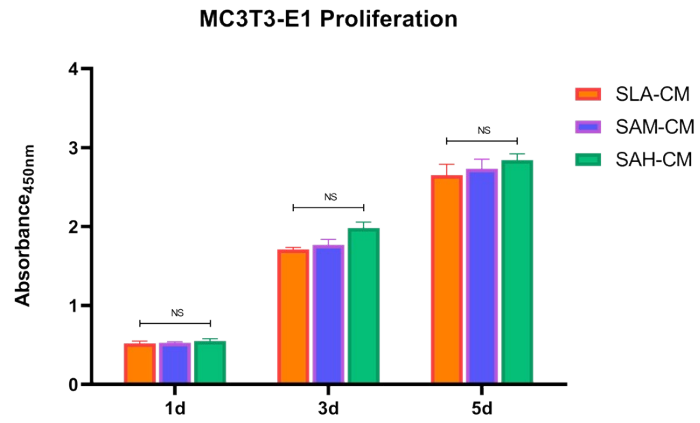

**Figure S3.** Effects of CM on MC3T3-E1 cell proliferation at different time points, the results showed no significant differences among three groups. NS = not significant.

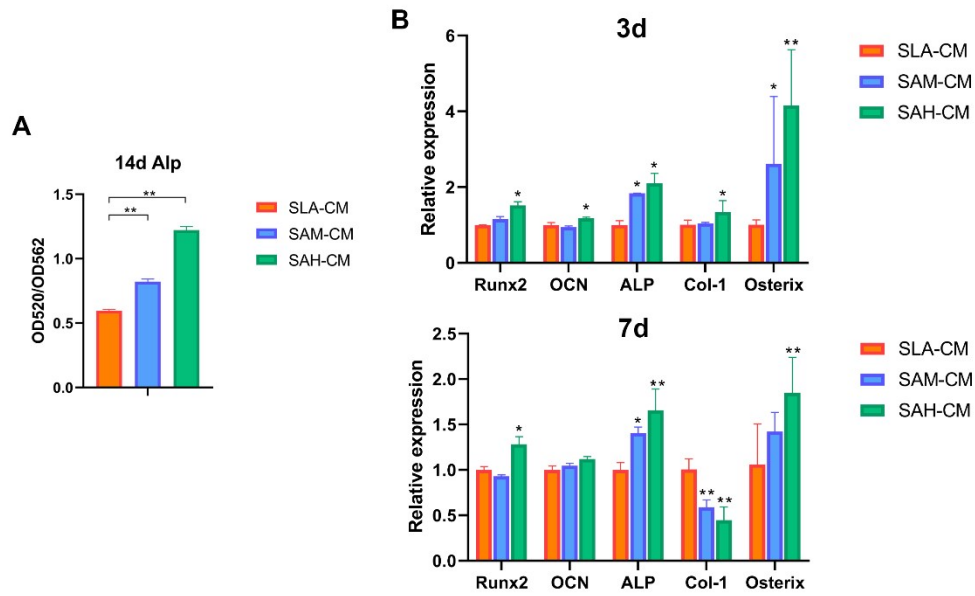

**Figure S4.** The osteogenesis behaviour of MC3T3-E1 cells treated with CM. (A) Alkaline phosphatase activity at 14 days of MC3T3-E1 cells, the total protein values were used for normalization. (B) The expression of osteogenesis-related genes RUNX2, OCN, ALP, COL-1, and Osterix at 3 or 7 days in MC3T3-E1 cells after culturing with CM. □P<0.05, □□P<0.01 compared with SLA-CM.

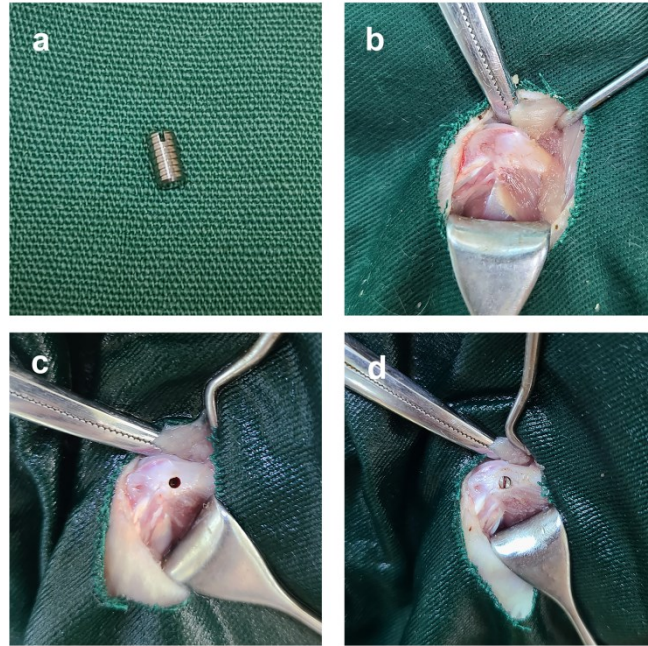

**Figure S5.** Surgical procedures. (a) The titanium screw used in this surgery (b) The inside of distal femur was exposed.(c) A 2.0-mm diameter hole was prepared 1 mm away from the growth plate and (d) the titanium screw was inserted in place.

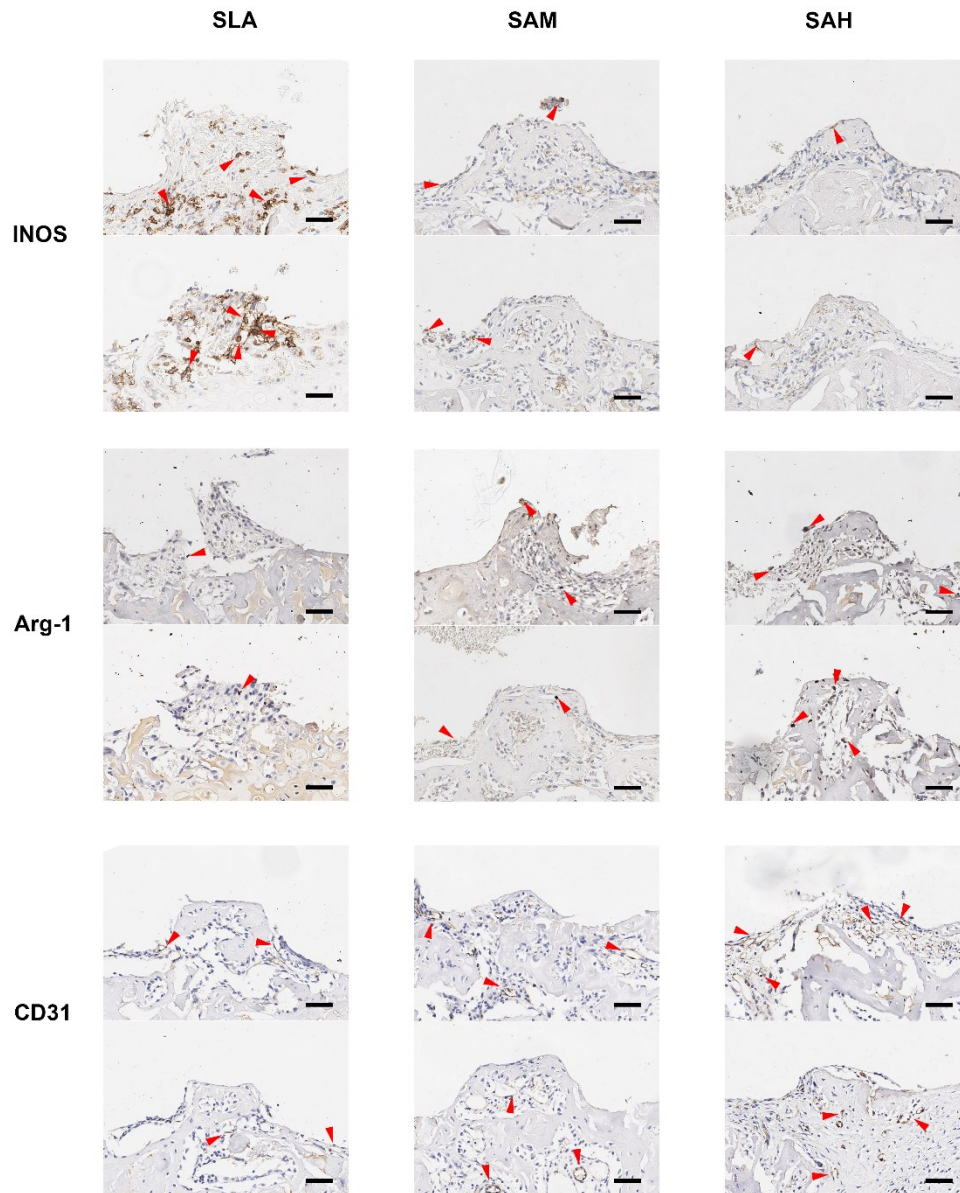

**Figure S6.** Supplementary representative immunohistochemical images of macrophage polarization and CD31 1 week after implantation. Arrows = Representative cells with positive staining. Scale bar = 50  $\mu\text{m}$ .

| <b>Samples</b> | <b>Titanium</b> | <b>Oxygen</b> | <b>Carbon</b> | <b>Sodium</b> |
|----------------|-----------------|---------------|---------------|---------------|
| <b>SLA</b>     | <b>79.78</b>    | <b>18.95</b>  | <b>1.27</b>   | <b>0</b>      |
| <b>SAM</b>     | <b>74.06</b>    | <b>24.28</b>  | <b>1.08</b>   | <b>0.58</b>   |
| <b>SAH</b>     | <b>67.63</b>    | <b>30.03</b>  | <b>0.85</b>   | <b>1.49</b>   |

**Table S1.** X-ray energy dispersive spectrometry (EDS) analysis of the elemental composition (wt%).

Titanium, oxygen, carbon, and sodium were present on the surface of samples



| <b>Genes</b> | <b>Primer sequences(5'-3')</b> |
|--------------|--------------------------------|
| mOCN F       | AGCTTAACCCTGCTTGTGACGA         |
| mOCN R       | CGGTCTTCAAGCCATACTGGTC         |
| mALP F       | TGGACGGTGAACGGGAAAAT           |
| mALP R       | TAGTTCTGCTCATGGACGCC           |
| mRUNX2 F     | ATTACAGATCCCAGGCAGGCA          |
| mRUNX2 R     | CAGAAGTCAGAGGTGGCAGTGT         |
| mCOL1 F      | TGGCAAAGACGGACTCAAC            |
| mCOL1 R      | GGCAGGAAGCTGAAGTCATAA          |
| mOsterix F   | CAACCTGCTAGAGATCTGAG           |
| mOsterix R   | TGCAATAGGAGAGAGCGA             |

**Table S2.** Osteogenesis-related gene primers used in the qRT-PCR
